# Supplementary material for: Infliximab and Adalimumab Monitoring versus Clinical Control during Maintenance Therapy in Randomized Patients with Inflammatory Bowel Disease
Source: Research Square preprint supplement (doi:10.21203/rs.3.rs-7537370/v1), 2025-10-21
Supplement: Supplementary file 1 [file 71457e8d1c77573add70cb37.docx]

Table 1. Baseline characteristics of the patients

| **Variable** | **Clinical practice** | **Therapeutic Drug Monitoring** | **Total** |
| --- | --- | --- | --- |
| **Patients**, n(%) | 105 (50.2) | 104 (49.8) | 209 (100.0) |
| **Gender**(%) |  |  |  |
| Male | 55 (52.4) | 64 (61.5) | 119 (56.9) |
| Female | 50 (47.6) | 40 (38.5) | 90 (43.1) |
| **Age**, mean(SD) | 51.333 (13.64) | 51.500 (12.74) | 51.416 (13.17) |
| **Smoking habit**, n(%) |  |  |  |
| Non-smoker | 44 (42.7) | 35 (33.7) | 79 (38.2) |
| Ex-smoker (> 6 months) | 31 (30.1) | 39 (37.5) | 70 (33.8) |
| Smoker | 28 (27.2) | 30 (28.8) | 58 (28.0) |
| **Crohn’s disease**, n(%) | 76 (72.4) | 80 (76.9) | 156 (74.6) |
| **Phenotipe Crohn’s disease** |  |  |  |
| Stenotic, n(%) | 15 (19.7) | 17 (21.2) | 32 (20.5) |
| Fistulising, n(%) | 26 (34.2 ) | 17 (21.2) | 43 (27.6) |
| Inflammatory, n(%) | 35 (46.1) | 46 (57.5) | 81 (51.9) |
| **Harvey-Bradshaw score**, mean (SD) | 1.36 (1.40) | 1.04 (1.31) | 1.19 (1.36) |
| **Ulcerative Colitis,** n(%) | 29 (27.6) | 24 (23.1) | 53 (25.4) |
| **Extension Ulcerative Colitis,** n(%) |  |  |  |
| Extensive colitis | 15 (51.4) | 16 (66.7) | 31 (58.5) |
| Left colitis | 14 (48.3) | 6 (25.0) | 20 (37.7 ) |
| Proctitis | 0 (00.0) | 2 (8.3) | 2 (3.8) |
| **Partial Mayo Score**, mean(SD) | 0.35 (0.62) | 0.29 (0.61) | 0.32 (0.61) |
| **Remission** (years), mean(SD) | 3.00 (2.89) | 3.18 (2.47) | 3.08 (2.68) |
| **Type of Anti-TNF,** n(%) |  |  |  |
| Infliximab | 54 (51.4) | 53 (51.0) | 107 (51.2) |
| Adalimumab | 51 (48.6) | 51 (49.0) | 102 (48.8) |
| **Time since first IFX** (years),median (IQR) | 4.84 [6.14-3.77] | 4.73 [5.73-3.73] | 4.84 [5.61-4.08] |
| **Time since first ADA** (years),median (IQR) | 4.36 [5.25-3.46] | 4.56 [5.47-3.64] | 4.46 [5.08-3.83] |
| **Immunosuppresive Drugs**, n(%) |  |  |  |
| No | 56 (53.3) | 51 (49.0) | 107 (51.2) |
| Yes | 49 (46.7) | 53 (51.0) | 102 (48.8) |
| **Duration of disease** (years) mean(SD) | 19.40 (8.74) | 18.49 (9.04) | 18.97(8.88) |
| **Tobacco use,** n(%) |  |  |  |
| Non-smoker | 44 (42.7) | 35 (33.7) | 79 (38.2) |
| Ex-smoker (>6 meses) | 31 (30.1) | 39 (37.5) | 70 (33.8) |
| Smoker | 28 (27.2) | 30 (28.8) | 58 (28.0) |
| **PCR (mg/dl),** mean(SD) | 0.29 (0.49) | 0.43 (0.88) | 0.37 (0.71) |
| **Calprotectin (mg/kg),** mean(SD) | 122.13 (293.61) | 83.66 (132.17) | 102.38 (225.82) |
| **Albumina (g/dl),** mean (SD) | 4.36 (0.31) | 4.38 (0.31) | 4.37 (0.31) |
| **Hb (g/dl),** mean (SD) | 76.13 (15.53) | 14.32 (1.10) | 14.29 (1.74) |
| **IBDQ9,** mean (SD) | 69.99 (12.86) | 69.34 (9.13) | 69.67 (11.15) |
| **Index EQ5D5L,** mean (SD) | 0.91 (0.12) | 0.90 (0.13) | 0.90 (0.12) |
| **EVA EQ5D5L**, mean (SD) | 76.13 (15.53) | 78.14 (15.23) | 77.09 (15.38) |

| **Anti-TNF** | **Group CP** | **Group TDM** | **Total** |
| --- | --- | --- | --- |
| **Infliximab**,n(%)  Levels, median (SD)  Optimal range, n (%)  Yes  No  Underoptimal range , n(%)  Upperoptimal range, n(%)  **Antibodies to IFX (ATI)**, n(%) | **54 (50.5)**  5.3 (4.0)  25 (47.2)  28 (52.8)  18 (33.3)  10 (18.5)  1 (1.85) | **53 (49.5)**  5.2 (3.8)  26 (49.1)  27 (50.8)  15 (28.3)  12 (28.3)  1(1.88) | **107 (100)**  5.2 (3.9)  55 (51.9)  51 (48.1)  23 (29.9)  22 (20.5)  2(1.86) |
| **Adalimumab**,n(%)  Levels, median (SD)  Optimal range, n (%)  Yes  No  Underoptimal range, n(%)  Upperoptimal range, n(%)  **Antibodies to ADA (ATA)**, n(%) | **51 (50.0)**  7.5(3.6)  20(39.2)  31(60.8)  12(23.5)  19 (37.2)  1(1.96) | **51 (50.0)**  7.4(3.5)  16(31.4)  35(68.6)  15(29.4)  20(39.2)  1(1.96) | **102 (100)**  7.5(3.5)  36(35.3)  66 (64.7)  27 (26.4)  39(38.2)  2(1.96) |

Table 2. Basal levels Infliximab and Adalimumab in CP and TDM group

Table 3. Adverse Events during the study

| **Adverse Events** | **Clinical Practice (CP)**  (n=105) | **Therapeutic Drug Monitoring (TDM)**  (n=104) |
| --- | --- | --- |
| Total (n=47) 22.48% | (n=26) 24.76% | (n=21) 20.19% |
| **Infections**  Serious  Pneumonia  Meningitis Listeria  Upper Respiratory Tract  Gastrointestinal  Urinary  Foliculitis  Abdominal Abcess  Perianal Abcess  Herpes zoster  Herpes labial  **Cutaneus**  Urticaria  Psoriasis  Vasculitis  **Arthralgia**  **Lupus-like**  **Infusional reaction**  **Neoplasia**  Vesical | 1(0.9)  1(0.9)  8(7.6)  4(3.8)  2(1.9)  1(0.9)  1(0.9)  1(0.9)  1(0.9)  1(0.9)  0(0)  2(1.9)  1(0.9)  1(0.9)  0(0)  0(0)  1(0.9) | 0(0)  0(0)  7(6.7)  5(4.8)  1(0.9)  0(0)  0(0)  0(0)  0(0)  1(0.9)  1(0.9)  1(0.9)  0(0)  2(1.9)  1(0.9)  1(0.9)  1(0.9) |
